# Supplementary material
Source: publisher site journal article supplement (https://www.dovepress.com/article/438359)
Supplement: Supplementary file 1 [file get_supplementary_file.php]

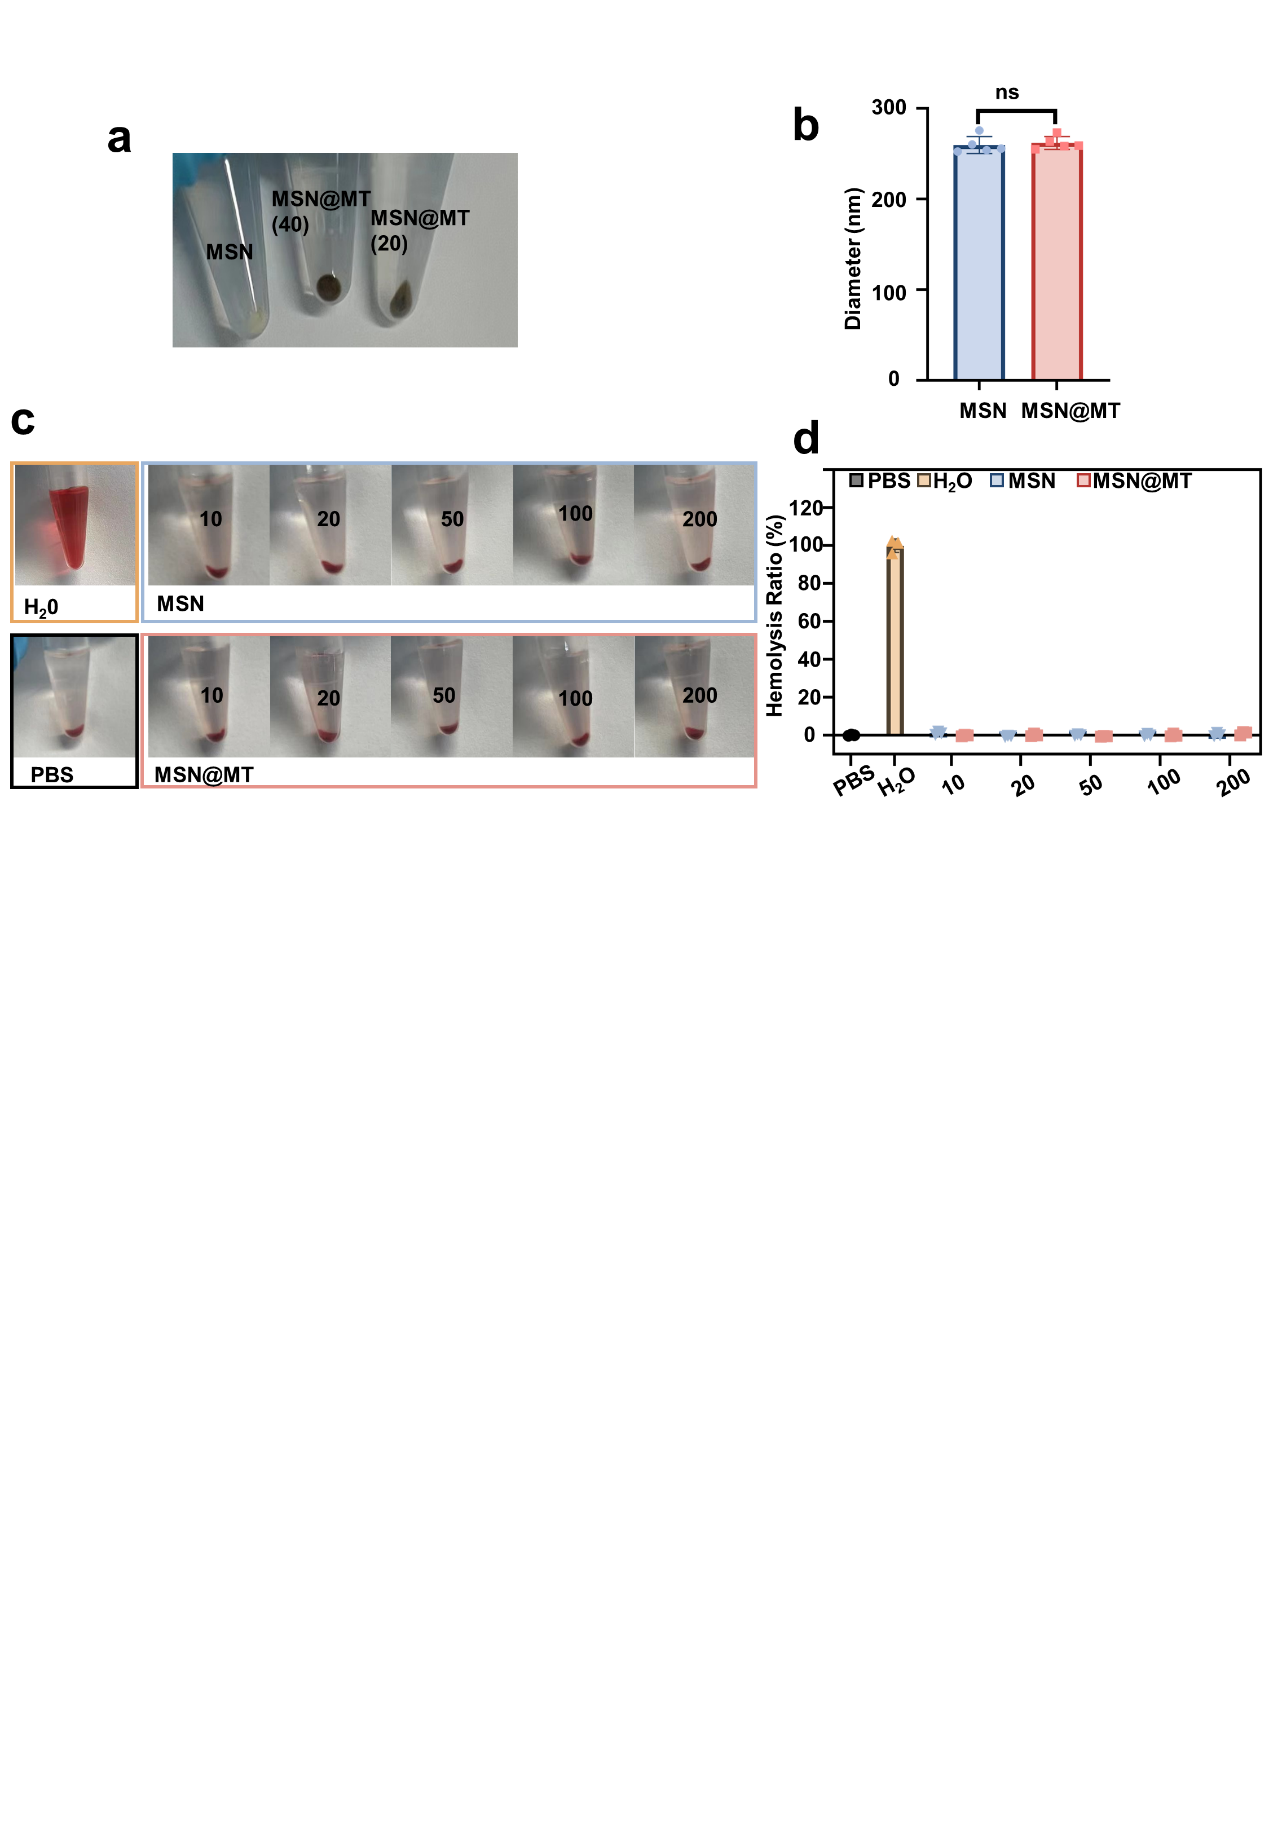
**Figure S1** The sedimentation appearance, diameter measured in TEM images, and hemolysis assay of MSN@MT.

(**a**). Representative images of MSN and MSN@MT coated with varying original concentrations of Mn2+/TA (20 and 40 μg/mL). (**b**). Comparison of diameters between MSN and MSN@MT, measured using ImageJ software (n=5). (**c**). Representative images of co-culture of MSN and MSN@MT with fresh mouse red blood cells for 2 hours. (**d**). Hemolysis ratio after 2-hour co-culture of MSN and MSN@MT with fresh mouse red blood cells, with H2O as the positive control and PBS as the negative control (n = 3).

**
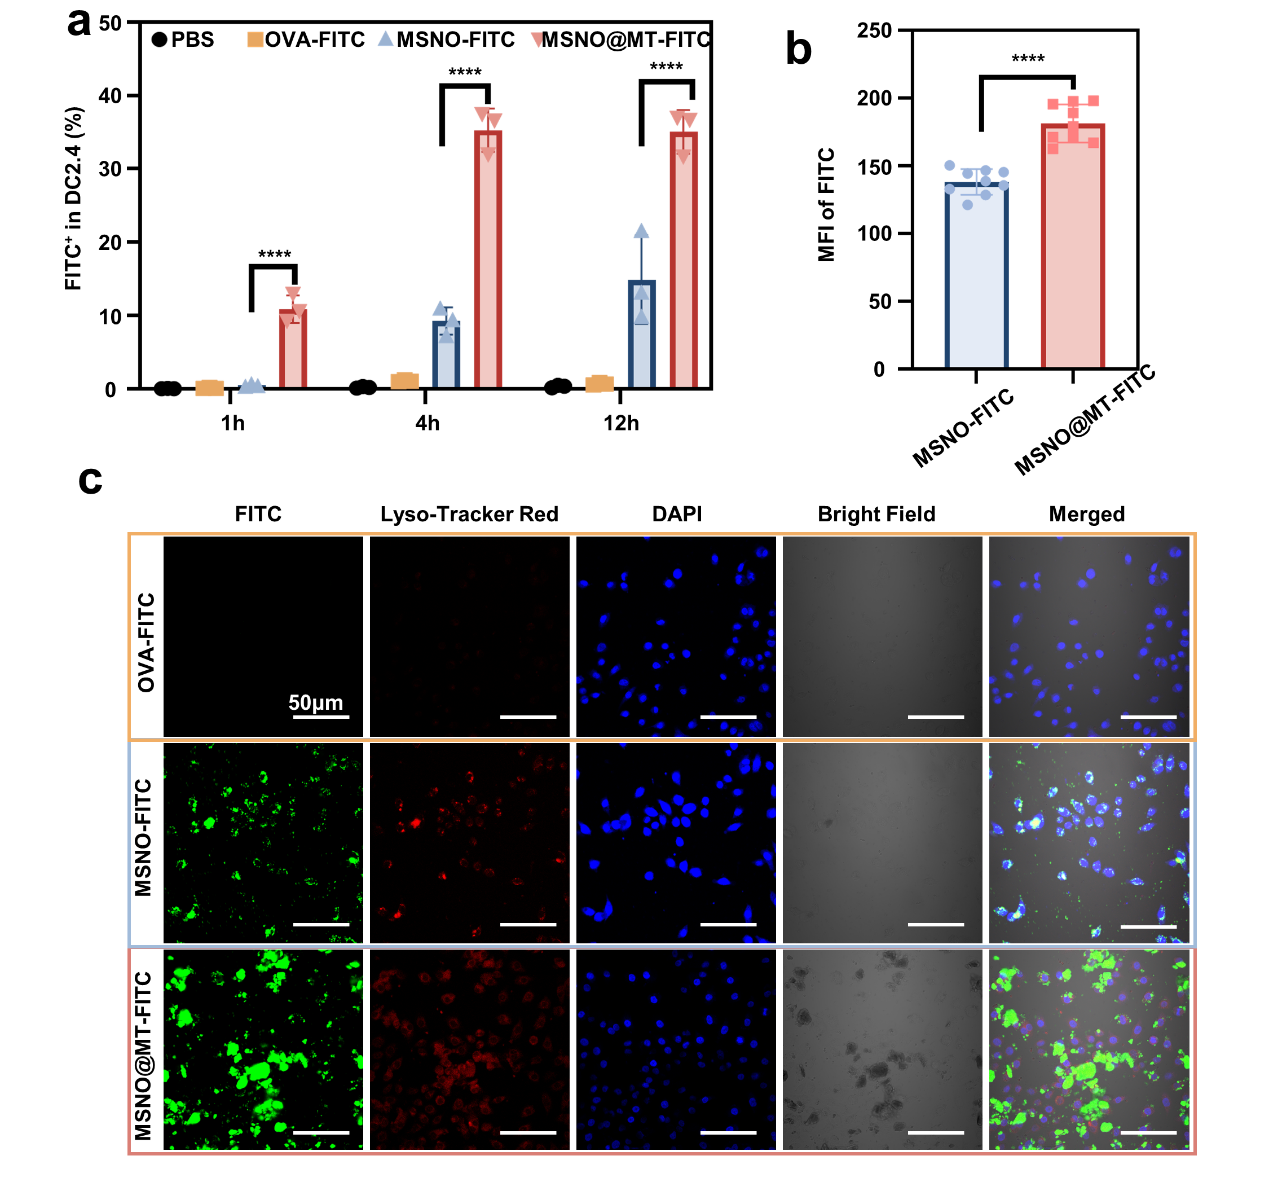
Figure S2** MSN@MT can enhance the uptake of OVA-FITC by DCs.

(**a**). Proportion of FITC+ cells in DC2.4 cells after co-culture with OVA-FITC, MSNO-FITC, and MSNO@MT-FITC for 1, 4, and 12 hours, as determined by flow cytometry (n=3). The indicated groups were analyzed using two-way ANOVA. (**b**). Quantitative analysis of average FITC fluorescence intensity in CLSM images to compare the uptake of equivalent amounts of OVA-FITC by DCs between MSN and MSN@MT (n=9, from 9 independent randomly chosen fields). The indicated groups were analyzed using one-way ANOVA. (**c**). Confocal microscopy (CLSM) representative images of DC2.4 cells after 6-hour co-culture with OVA-FITC, MSNO-FITC, and MSNO@MT-FITC. Blue represents cell nuclei, green represents OVA-FITC, red represents lysosomes stained with Lysotracker Red, and yellow represents co-localization of OVA-FITC with lysosomes. Scale bars, 50 μm. ****P < 0.0001


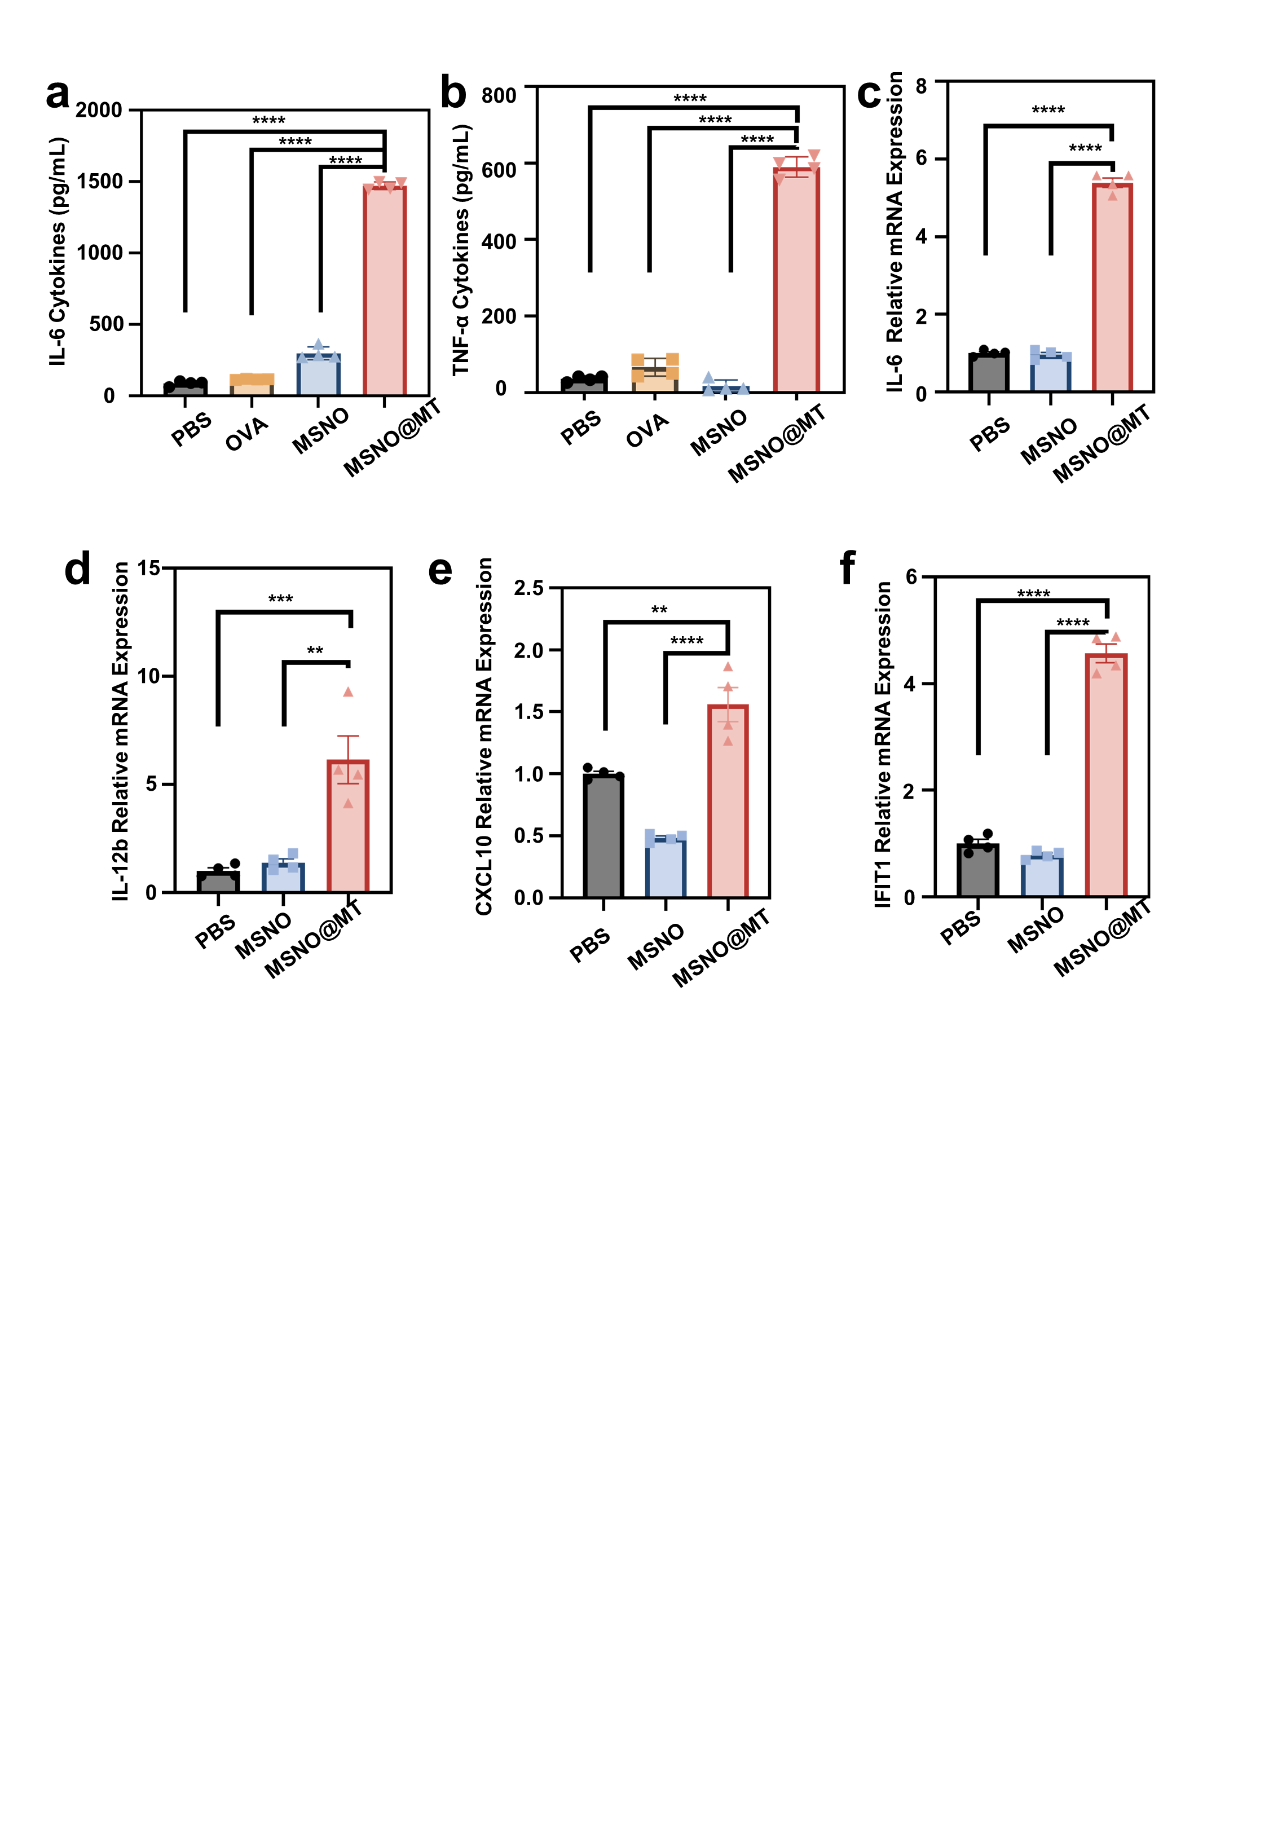


**Figure S3** MSNO@MT can stimulate BMDCs in vitro to produce pro-inflammatory cytokines and upregulate the expression of cGAS-STING pathway-related genes.

(**a, b**). IL-6 levels (a) and TNFα levels (b) in the cell supernatant of BMDCs after 24-hour co-culture with PBS, MSNO, and MSNO@MT, measured by ELISA (n=4). (**c, d, e, f**). Relative levels of IL-6 (c), IL-12b (d), CXCL10 (e) and IFIT1 (f)mRNA expression levels in BMDCs after 24-hour co-culture with different treatment groups, measured by qPCR (n=4). The indicated groups were analyzed using one-way ANOVA. Significance levels are classified as ** P < 0.01, *** P < 0.001, and **** P < 0.0001.


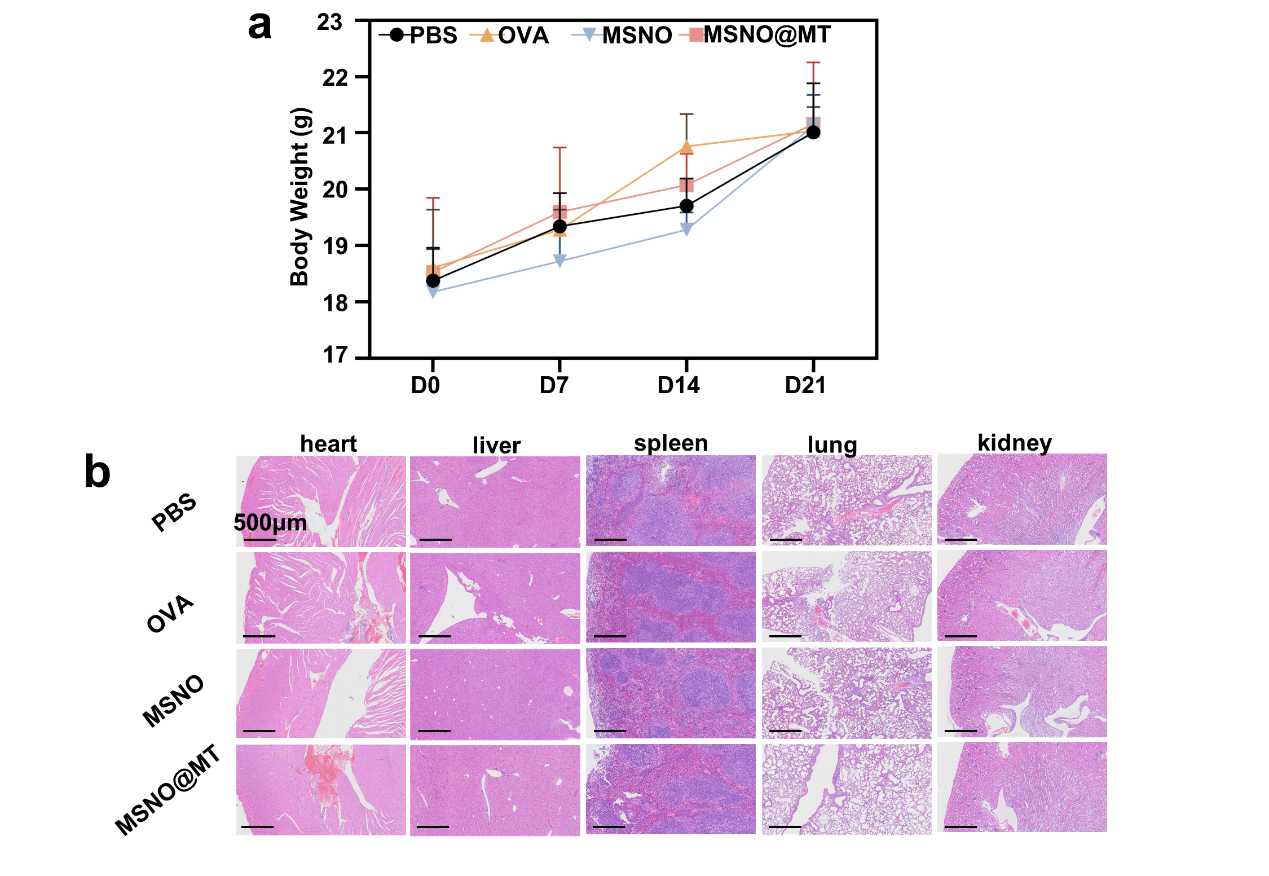


**Figure S4** MSNO@MT demonstrates excellent biocompatibility in vivo.

(**a**). Weight changes of mice in different treatment groups on days 0, 7, 14, and 21 (n=5). (**b**). Representative histological sections of major organs (heart, liver, spleen, lung, kidney) from mice in different treatment groups stained with H & E. Scale bar, 500 μm.

**Table S1.** Weight of OVA, TA, Mn2+ in 1mg MSN.

| **OVA** | **TA** | **Mn2+** |
| --- | --- | --- |
| 0~1300μg  (500μg in cell and animal experiments) | 7.6 μg | 0.725μg |
